# Supplementary material for: Investigation of the Formal Pathogenesis of Green Liver Discoloration in Organically Reared Female Bronze Turkeys (Melleagris gallovapo)
Source: MDPI journal article supplement (doi:10.3390/ani13091558), 2023-05-06
Supplement: s1 [file s1]

**Table S1.** Raw nutrient concentrations in feed samples (mean, minimum - maximum) referred to 88% DM.

| Feed sample             | N  | ASH<br>(g/kg)             | CFAT<br>(g/kg)           | CP<br>(g/kg)                | CF<br>(g/kg)              | NFE<br>(g/kg)               | Starch<br>(g/kg)            |
|-------------------------|----|---------------------------|--------------------------|-----------------------------|---------------------------|-----------------------------|-----------------------------|
| Starter feed            | 11 | 76.44<br>(69.73 - 109.41) | 57.54<br>(48.73 - 75.8)  | 281.42<br>(255.73 - 301.58) | 37.83<br>(25.31 - 43.22)  | 426.86<br>(393.86 - 460.91) | 273.61<br>(247.35 - 318.94) |
| Phase 1                 | 11 | 71.35<br>(63.29 - 83.66)  | 53.17<br>(44.48 - 69.72) | 268.13<br>(230.45 - 288.84) | 38.44<br>(29.01 - 61.26)  | 448.94<br>(438.05 - 487.37) | 296.92<br>(284.28 - 340.87) |
| Phase 2                 | 10 | 65.76<br>(61.50 - 73.07)  | 49.11<br>(44.05 - 58.34) | 237.96<br>(207.40 - 252.26) | 40.66<br>(36.34 - 44.53)  | 486.57<br>(472.95 - 504.93) | 346.82<br>(327.94 - 365.37) |
| Phase 3                 | 10 | 59.18<br>(56.09 - 62.33)  | 43.73<br>(40.11 - 48.59) | 176.63<br>(158.56 - 187.09) | 40.28<br>(36.08 - 46.42)  | 560.07<br>(544.43 - 581.71) | 417.67<br>(403.87 - 440)    |
| Final fattening<br>feed | 10 | 57.49<br>(47.83 - 64.75)  | 42.00<br>(34.59 - 60.95) | 155.18<br>(145.85 - 166.78) | 38.32<br>(34.73 - 41.78)  | 587.14<br>(567.77 - 601.02) | 440.12<br>(411.66 - 461.05) |
| Oat                     | 5  | 26.33<br>(24.09 - 28.41)  | 43.29<br>(34.73 - 60.84) | 97.42<br>(82.77 - 113.55)   | 99.19<br>(87.22 - 118.39) | 613.62<br>(602.78 - 620.25) | 398.59<br>(351.21 - 427.65) |
| Wheat                   | 1  | 15.35                     | 21.02                    | 92.20                       | 25.62                     | 725.51                      | 607.20                      |

ASH: crude ash; CF: crude fiber; CFAT: crude fat; CP: crude protein; DM: dry matter; NFE: nitrogen-free extracts.

**Table S2.** Raw nutrient, energy, and amino acid concentrations in feed samples (mean, minimum - maximum) referred to 88% DM.

| Feed sample             | N  | SU<br>(g/kg)             | AMEn<br>(kcal/kg)                 | (MJ/kg)                  | MET<br>(g/kg)         | MET + CYS<br>(g/kg)    |
|-------------------------|----|--------------------------|-----------------------------------|--------------------------|-----------------------|------------------------|
| Starter feed            | 11 | 36.94<br>(30.14 - 46.83) | 2,718.07<br>(2,612.97 – 2,799.27) | 11.38<br>(10.94 - 11.72) | 5.16<br>(4.15 - 6.15) | 9.50<br>(8.35 - 10.59) |
| Phase 1                 | 11 | 36.66<br>(31.34 - 44.73) | 2,722.84<br>(2,665.52 – 2,782.55) | 11.40<br>(11.16 - 11.65) | 5.08<br>(3.27 - 5.80) | 9.28<br>(6.77 - 10.96) |
| Phase 2                 | 10 | 38.71<br>(34.13 - 42.45) | 2,784.94<br>(2,718.07 – 2,870.93) | 11.66<br>(11.38 - 12.02) | 4.27<br>(3.63 - 4.91) | 8.15<br>(6.92 - 9.44)  |
| Phase 3                 | 10 | 40.70<br>(37.78 - 43.71) | 2,804.05<br>(2,761.06 – 2,856.60) | 11.74<br>(11.56 - 11.96) | 3.28<br>(2.71 - 4.26) | 6.52<br>(5.51 - 7.6)   |
| Final fattening<br>feed | 10 | 39.71<br>(37.22 - 42.68) | 2,794.50<br>(2,694.18 – 2,873.32) | 11.70<br>(11.28 - 12.03) | 2.41<br>(1.92 - 3.27) | 5.29<br>(4.44 - 6.26)  |
| Oat                     | 5  | 11.51<br>(10.95 - 12.20) | 2,335.91<br>(2,073.18 – 2,548.49) | 9.78<br>(8.68 - 10.67)   | 1.85<br>(1.57 - 2.27) | 4.65<br>(4.03 - 5.00)  |
| Wheat                   | 1  | 28.84                    | 3,035.73                          | 12.71                    | 1.84                  | 3.92                   |

AMEn: apparent metabolizable energy corrected by nitrogen; CYS: cysteine; DM: dry matter; MET: methionine; SU: sugar.

**Table S3.** Amino acid concentrations in feed samples (mean, minimum - maximum) referred to 88% DM.

| Feed sample          | N  | LYS<br>(g/kg)            | THR<br>(g/kg)           | CYS<br>(g/kg)         | ASP<br>(mg/kg)           | SER<br>(mg/kg)           | GLU<br>(mg/kg)           |
|----------------------|----|--------------------------|-------------------------|-----------------------|--------------------------|--------------------------|--------------------------|
| Starter feed         | 11 | 14.94<br>(13.52 - 16.06) | 11.42<br>(9.85 – 15.60) | 4.34<br>(3.96 – 4.96) | 26.97<br>(23.73 – 28.95) | 14.11<br>(12.45 – 16.35) | 54.03<br>(50.98 – 58.86) |
| Phase 1              | 11 | 13.81<br>(11.86 - 15.02) | 10.51<br>(8.14 – 11.55) | 4.20<br>(3.50 – 5.17) | 25.11<br>(22.36 -27.92)  | 13.58<br>(11.28 – 15.98) | 52.81<br>(43.37 – 57.48) |
| Phase 2              | 10 | 12.29<br>(11.63 - 13.12) | 9.12<br>(7.45 – 10.17)  | 3.88<br>(3.04 – 4.58) | 22.65<br>(19.67 – 25.18) | 11.88<br>(10.47 – 12.85) | 48.69<br>(43.85 – 53.55) |
| Phase 3              | 10 | 8.97<br>(7.55 - 10.24)   | 6.66<br>(5.16 – 7.55)   | 3.24<br>(2.69 – 3.63) | 16.89<br>(14.57 – 18.73) | 8.68<br>(7.40 – 10.05)   | 38.98<br>(35.36 – 43.80) |
| Final fattening feed | 10 | 7.55<br>(6.82 - 8.68)    | 5.48<br>(4.65 – 5.90)   | 2.88<br>(2.49 – 3.36) | 14.13<br>(12.74 – 16.41) | 7.40<br>(6.80 – 8.14)    | 36.53<br>(32.21 – 40.24) |
| Oat                  | 5  | 4.16<br>(3.62 - 4.85)    | 3.58<br>(2.95 – 4.06)   | 2.81<br>(2.44 – 3.06) | 8.07<br>(7.03 – 9.28)    | 4.70<br>(4.00 – 5.33)    | 21.18<br>(18.57 – 24.18) |
| Wheat                | 1  | 2.85                     | 3.32                    | 2.08                  | 5.02                     | 4.30                     | 26.20                    |

ASP: aspartic acid; GLU: glutamic acid; DM: dry matter; LYS: lysine; SER: serine; THR: threonine.

**Table S4.** Amino acid concentrations in feed samples (mean, minimum - maximum) referred to 88% DM.

| Feed sample          | N  | GLY<br>(mg/kg)           | ALA<br>(mg/kg)           | VAL<br>(mg/kg)           | ISO<br>(mg/kg)           | LEU<br>(mg/kg)           | TYR<br>(mg/kg)          |
|----------------------|----|--------------------------|--------------------------|--------------------------|--------------------------|--------------------------|-------------------------|
| Starter feed         | 11 | 13.16<br>(11.77 – 15.31) | 15.27<br>(13.56 – 16.83) | 14.16<br>(12.74 – 15.68) | 12.09<br>(10.79 – 12.98) | 25.54<br>(23.05 – 29.11) | 10.29<br>(9.17 – 11.73) |
| Phase 1              | 11 | 12.61<br>(10.50 – 14.46) | 14.88<br>(10.79 – 16.75) | 13.41<br>(11.09 – 15.31) | 11.34<br>(9.57 – 12.42)  | 24.76<br>(17.89 – 28.31) | 9.79<br>(8.02 – 11.17)  |
| Phase 2              | 10 | 10.91<br>(9.83 – 11.63)  | 12.23<br>(10.18 – 13.22) | 11.81<br>(10.18 – 12.74) | 10.00<br>(8.57 – 10.96)  | 20.74<br>(15.70 – 22.96) | 9.16<br>(6.40 – 12.70)  |
| Phase 3              | 10 | 8.31<br>(7.18 – 8.91)    | 8.04<br>(6.88 – 8.88)    | 8.81<br>(7.79 – 9.66)    | 7.40<br>(6.41 – 8.11)    | 13.67<br>(11.89 – 15.12) | 5.44<br>(2.80 – 6.49)   |
| Final fattening feed | 10 | 7.05<br>(6.63 – 7.71)    | 6.77<br>(6.44 – 7.34)    | 7.39<br>(6.87 – 8.17)    | 6.20<br>(5.73 – 6.91)    | 11.39<br>(10.51 – 12.50) | 4.90<br>(4.48 – 5.66)   |
| Oat                  | 5  | 5.08<br>(4.39 – 5.90)    | 4.77<br>(4.08 – 5.53)    | 5.11<br>(4.56 – 6.00)    | 3.57<br>(3.13 – 4.23)    | 7.13<br>(6.19 – 8.24)    | 3.16<br>(2.75 – 3.80)   |
| Wheat                | 1  | 3.94                     | 3.69                     | 4.13                     | 3.15                     | 6.04                     | 3.09                    |

ALA: alanine; DM: dry matter; GLY: glycine; ISO: isoleucine; LEU: leucine; TYR: tyrosine; VAL: valine.

**Table S5.** Amino acid concentrations in feed samples (mean, minimum - maximum) referred to 88% DM.

| Feed sample          | N  | PHE<br>(mg/kg)           | HIS<br>(mg/kg)        | ARG<br>(mg/kg)           | PRO<br>(mg/kg)           | OH-Proline<br>(mg/kg) | TAU<br>(mg/kg) |
|----------------------|----|--------------------------|-----------------------|--------------------------|--------------------------|-----------------------|----------------|
| Starter feed         | 11 | 14.31<br>(12.84 – 15.87) | 6.39<br>(5.82 – 6.80) | 16.72<br>(14.97 – 17.46) | 17.16<br>(15.61 – 21.98) | 0<br>(0 – 0)          | 0<br>(0 – 0)   |
| Phase 1              | 11 | 13.51<br>(11.28 – 15.21) | 6.11<br>(5.53 – 6.57) | 16.06<br>(14.55 – 17.42) | 16.86<br>(12.74 – 20.41) | 0<br>(0 – 0)          | 0<br>(0 – 0)   |
| Phase 2              | 10 | 11.23<br>(8.79 – 13.32)  | 5.40<br>(4.89 – 5.90) | 14.60<br>(13.71 – 15.92) | 14.80<br>(12.50 – 16.95) | 0<br>(0 – 0)          | 0<br>(0 – 0)   |
| Phase 3              | 10 | 8.60<br>(7.51 – 9.43)    | 4.23<br>(3.84 – 4.70) | 11.55<br>(10.60 – 12.39) | 11.25<br>(9.61 – 12.07)  | 0<br>(0 – 0)          | 0<br>(0 – 0)   |
| Final fattening feed | 10 | 7.32<br>(6.73 – 8.20)    | 3.76<br>(3.55 – 4.10) | 10.46<br>(9.80 – 11.92)  | 9.97<br>(8.97 – 11.63)   | 0<br>(0 – 0)          | 0<br>(0 – 0)   |
| Oat                  | 5  | 4.76<br>(4.17 – 5.59)    | 2.09<br>(1.81 – 2.51) | 6.52<br>(5.61 – 7.87)    | 5.10<br>(4.41 – 5.78)    | 0<br>(0 – 0)          | 0<br>(0 – 0)   |
| Wheat                | 1  | 4.08                     | 2.12                  | 4.64                     | 8.18                     | 0                     | 0              |

ARG: arginine; DM: dry matter; HIS: histidine; PHE: phenylalanine; PRO: proline; TAU: taurine.

**Table S6.** Bulk and trace element concentrations in feed samples (mean, minimum - maximum) referred to 88% DM.

| Feed sample             | N  | Ca<br>(g/kg)             | P<br>(g/kg)            | Ca:P<br>ratio         | Zn<br>(mg/kg)               | Mn<br>(mg/kg)               | Se<br>(mg/kg)          |
|-------------------------|----|--------------------------|------------------------|-----------------------|-----------------------------|-----------------------------|------------------------|
| Starter feed            | 11 | 14.39<br>(10.65 - 24.83) | 9.63<br>(8.10 - 15.98) | 1.49<br>(1.31 - 1.70) | 153.93<br>(125.85 - 303.48) | 141.56<br>(108.55 - 278.75) | 0.91<br>(0.32 - 1.59)  |
| Phase 1                 | 11 | 13.29<br>(11.57 - 16.87) | 8.73<br>(7.44 - 10.12) | 1.53<br>(1.26 - 1.73) | 137.56<br>(125.99 - 158.67) | 113.88<br>(83.15 - 141.65)  | 0.93<br>(0.32 - 1.32)  |
| Phase 2                 | 10 | 12.15<br>(10.58 - 15.31) | 7.76<br>(7.04 - 8.53)  | 1.56<br>(1.35 - 1.81) | 128.39<br>(117.66 - 146.83) | 110.41<br>(82.13 - 127.10)  | 0.71<br>(0.40 - 0.99)  |
| Phase 3                 | 10 | 11.01<br>(10.04 - 12.34) | 6.97<br>(6.47 - 7.51)  | 1.58<br>(1.45 - 1.91) | 126.84<br>(105.13 - 145.68) | 108.26<br>(86.73 - 138.08)  | 0.71<br>(0.33 - 0.99)  |
| Final fattening<br>feed | 10 | 10.98<br>(7.42 - 12.50)  | 6.82<br>(6.32 - 7.01)  | 1.61<br>(1.17 - 1.82) | 120.80<br>(91.58 - 133.81)  | 111.72<br>(79.25 - 152.1)   | 0.63<br>(0.34 - 0.92)  |
| Oat                     | 5  | 1.02<br>(0.54 - 1.55)    | 3.54<br>(3.22 - 3.76)  | 0.29<br>(0.15 - 0.41) | 22.88<br>(17.19 - 29.77)    | 25.07<br>(12.33 - 33.77)    | 0.08<br>(0.01 - 0.178) |
| Wheat                   | 1  | 0.99                     | 2.79                   | 0.35                  | 21.90                       | 23.08                       | 0.05                   |

Ca: calcium; DM: dry matter; Mn: manganese; P: phosphorus; Se: selenium; Zn: zinc.

**Table S7.** Vitamin concentrations in feed samples (mean, minimum - maximum) referred to 88% DM.

| Feed sample          | N  | Vitamin D <sub>3</sub><br>(IE/kg) | Vitamin E<br>(mg/kg)      |
|----------------------|----|-----------------------------------|---------------------------|
| Starter feed         | 11 | 3858.00<br>(2742.00 - 5841.00)    | 52.09<br>(41.36 - 109.41) |
| Phase 1              | 11 | 3340.45<br>(2272.00 - 4240.00)    | 46.82<br>(40.94 - 56.30)  |
| Phase 2              | 10 | 3472.80<br>(2200.00 - 4371.00)    | 45.75<br>(32.95 - 54.82)  |
| Phase 3              | 10 | 3632.50<br>(2059.00 - 4420.00)    | 47.59<br>(40.78 - 51.87)  |
| Final fattening feed | 10 | 3673.10<br>(2914.00 - 4335.00)    | 44.26<br>(38.86 - 50.16)  |
| Oat                  | 5  | < 880                             | 10.68<br>(7.67 - 12.92)   |
| Wheat                | 1  | < 880                             | 12.81                     |

DM: dry matter.

**Table S8.** Raw nutrient and energy concentrations in feed samples: Actual supply during recommendation periods of the Society of Nutrition Physiology [31] referred to 88% DM or MJ AMEn; A = mean (minimum - maximum), B = recommendation [31,53] <sup>1</sup>.

| Phase | N | CP     |                             | AMEn                              |                          | CP                       | CF                       |
|-------|---|--------|-----------------------------|-----------------------------------|--------------------------|--------------------------|--------------------------|
|       |   | (g/kg) | (kcal/kg)                   | (MJ/kg)                           | (g/MJ) <sup>1</sup>      | (g/kg) <sup>1</sup>      | (g/kg) <sup>1</sup>      |
| 0     | A | 10     | 278.33<br>(261.42 - 292.16) | 2,720.45<br>(2,672.69 – 2,773.00) | 11.39<br>(11.19 - 11.61) | 24.45<br>(22.80 - 25.80) | 37.61<br>(29.71 - 43.22) |
|       | B |        | 253.00                      |                                   | 11.20 - 11.70            | 22.20                    | 35.00                    |
| 1     | A | 10     | 265.24<br>(249.27 - 284.99) | 2,732.40<br>(2,665.52 – 2,782.55) | 11.44<br>(11.16 - 11.65) | 23.57<br>(21.58 - 24.95) | 36.93<br>(31.1 - 42.4)   |
|       | B |        | 238.00                      |                                   | 11.50 - 12.00            | 20.50                    | 35.00                    |
| 2     | A | 10     | 243.97<br>(214.73 - 261.09) | 2,773.00<br>(2,708.51 – 2,858.99) | 11.61<br>(11.34 - 11.97) | 21.20<br>(18.25 - 23.05) | 40.75<br>(35.42 - 52.54) |
|       | B |        | 237.00                      |                                   | 11.80 - 12.30            | 20.40                    | 40.00 – 45.00            |
| 3     | A | 10     | 188.11<br>(170.43 - 203.26) | 2,796.89<br>(2,744.34 – 2,844.65) | 11.71<br>(11.49 - 11.91) | 16.93<br>(14.59 - 20.17) | 41.08<br>(36.18 - 50.80) |
|       | B |        | 210.00                      |                                   | 12.30 - 12.80            | 17.50                    | 40.00 – 45.00            |
| 4     | A | 10     | 162.66<br>(153.09 - 176.56) | 2,794.50<br>(2,694.18 – 2,839.88) | 11.70<br>(11.28 - 11.89) | 14.95<br>(13.00 - 24.31) | 39.15<br>(36.28 - 42.91) |
|       | B |        | 154.00                      |                                   | 12.80 - 13.20            | 12.50                    | 40.00 – 45.00            |
| 5     | A | 10     | 155.18<br>(145.85 - 166.78) | 2,794.50<br>(2,694.18 – 2,873.32) | 11.70<br>(11.28 - 12.03) | 14.25<br>(12.31 - 23.48) | 38.32<br>(34.73 - 41.78) |
|       | B |        | -                           |                                   | 12.80 - 13.20            | -                        | -                        |

AMEn: apparent metabolizable energy corrected by nitrogen; CF: crude fiber; CP: crude protein, DM: dry matter.



**Table S9.** Amino acid concentrations in feed samples: Actual supply during recommendation periods of the Society of Nutrition Physiology [31] referred to 88% DM or MJ AMEn; A = mean (minimum - maximum), B = recommendation [31,53] <sup>1</sup>.

| Phase |   | N  | THR<br>(g/kg)           | THR<br>(g/MJ AMEn) <sup>1</sup> | MET<br>(g/kg)         | MET<br>(g/MJ AMEn) <sup>1</sup> | MET + CYS<br>(g/kg)    | MET + CYS<br>(g/MJ AMEn) <sup>1</sup> | LYS<br>(g/kg)            |
|-------|---|----|-------------------------|---------------------------------|-----------------------|---------------------------------|------------------------|---------------------------------------|--------------------------|
| 0     | A | 10 | 11.24<br>(9.85 - 13.86) | 0.99<br>(0.85 - 1.21)           | 5.28<br>(4.56 - 5.97) | 0.46<br>(0.39 - 0.52)           | 9.60<br>(8.69 - 10.38) | 0.84<br>(0.75 - 0.91)                 | 14.66<br>(13.82 - 15.65) |
|       | B |    | 9.30                    | 0.86                            | 5.70                  | 0.48                            | 8.40                   | 0.76                                  | 17.00                    |
| 1     | A | 10 | 10.49<br>(9.44 - 11.59) | 0.92<br>(0.82 - 1.02)           | 5.08<br>(3.84 - 5.80) | 0.44<br>(0.33 - 0.50)           | 9.28<br>(7.79 - 10.96) | 0.81<br>(0.67 - 0.95)                 | 13.93<br>(12.66 - 15.13) |
|       | B |    | 9.00                    | 0.79                            | 5.60                  | 0.44                            | 8.50                   | 0.71                                  | 16.20                    |
| 2     | A | 10 | 9.31<br>(7.82 - 10.42)  | 0.80<br>(0.67 - 0.92)           | 4.35<br>(3.69 - 5.03) | 0.37<br>(0.32 - 0.44)           | 8.29<br>(6.93 - 9.57)  | 0.72<br>(0.61 - 0.83)                 | 12.57<br>(11.73 - 13.43) |
|       | B |    | 8.60                    | 0.78                            | 5.50                  | 0.41                            | 8.40                   | 0.68                                  | 15.50                    |
| 3     | A | 10 | 7.13<br>(6.19 - 7.81)   | 0.61<br>(0.53 - 0.67)           | 3.43<br>(3.07 - 4.33) | 0.32<br>(0.26 - 0.56)           | 6.79<br>(6.06 - 7.74)  | 0.58<br>(0.51 - 0.66)                 | 9.61<br>(8.21 - 10.69)   |
|       | B |    | 8.20                    | 0.74                            | 5.20                  | 0.39                            | 8.20                   | 0.67                                  | 14.60                    |
| 4     | A | 10 | 5.87<br>(5.20 - 6.77)   | 0.50<br>(0.44 - 0.58)           | 2.67<br>(2.02 - 3.80) | 0.43<br>(0.17 - 2.23)           | 5.67<br>(4.99 - 6.97)  | 0.48<br>(0.42 - 0.60)                 | 8.10<br>(7.24 - 9.77)    |
|       | B |    | 6.30                    | 0.58                            | 3.90                  | 0.32                            | 6.40                   | 0.56                                  | 11.40                    |
| 5     | A | 10 | 5.48<br>(4.65 - 5.90)   | 0.47<br>(0.39 - 0.49)           | 2.41<br>(1.92 - 3.27) | 0.41<br>(0.16 - 2.23)           | 5.29<br>(4.44 - 6.25)  | 0.45<br>(0.38 - 0.54)                 | 7.55<br>(6.82 - 8.68)    |

AMEn: apparent metabolizable energy corrected by nitrogen; CYS: cysteine; DM: dry matter; LYS: lysine; MET: methionine; THR: threonine.

**Table S10.** Amino acid concentrations in feed samples: Actual supply during recommendation periods of the Society of Nutrition Physiology [31] referred to 88% DM or MJ AMEn; A = mean (minimum - maximum), B = recommendation [31,53] <sup>1</sup>.

| Phase |   | N  | LYS<br>(g/MJ AMEn) <sup>1</sup> | ARG<br>(g/kg)            | VAL<br>(g/kg)            | ISO<br>(g/kg)            | LEU<br>(g/kg)            | PHE<br>(g/kg)            | HIS<br>(g/kg)         |
|-------|---|----|---------------------------------|--------------------------|--------------------------|--------------------------|--------------------------|--------------------------|-----------------------|
| 0     | A | 10 | 1.29<br>(1.21 - 1.37)           | 16.49<br>(15.27 - 17.46) | 14.02<br>(13.07 - 15.53) | 11.89<br>(11.03 - 12.76) | 25.53<br>(23.41 - 28.7)  | 14.12<br>(13.14 - 15.61) | 6.30<br>(5.90 - 6.80) |
|       | B |    | 1.41                            | 14.90                    | 11.10                    | 9.40                     | 18.20                    | 10.50                    | 5.50                  |
| 1     | A | 10 | 1.22<br>(1.09 - 1.33)           | 16.04<br>(15.17 - 16.86) | 13.50<br>(12.15 - 15.35) | 11.37<br>(10.70 - 12.48) | 24.80<br>(21.64 - 28.38) | 13.58<br>(12.19 - 15.28) | 6.12<br>(5.75 - 6.52) |
|       | B |    | 1.36                            | 14.60                    | 10.80                    | 9.10                     | 17.30                    | 9.90                     | 5.60                  |
| 2     | A | 10 | 1.31<br>(1.00 - 3.42)           | 14.93<br>(13.75 - 15.91) | 12.08<br>(10.61 - 13.02) | 10.24<br>(8.96 - 11.07)  | 21.48<br>(16.76 - 23.58) | 11.56<br>(9.02 - 13.42)  | 5.55<br>(5.07 - 5.94) |
|       | B |    | 1.29                            | 14.20                    | 10.40                    | 8.90                     | 16.50                    | 9.30                     | 5.50                  |
| 3     | A | 10 | 0.82<br>(0.71 - 0.90)           | 12.17<br>(10.91 - 13.22) | 9.38<br>(8.47 - 10.18)   | 7.88<br>(6.89 - 8.75)    | 15.61<br>(12.85 - 20.78) | 9.07<br>(8.11 - 10.18)   | 4.45<br>(4.04 - 4.84) |
|       | B |    | 1.16                            | 13.50                    | 9.80                     | 8.60                     | 15.60                    | 8.50                     | 5.40                  |
| 4     | A | 10 | 0.69<br>(0.61 - 0.82)           | 10.92<br>(10.27 - 11.99) | 7.95<br>(7.48 - 9.17)    | 6.66<br>(6.20 - 7.69)    | 12.38<br>(11.43 - 14.4)  | 7.82<br>(7.30 - 9.02)    | 3.95<br>(3.78 - 4.37) |
|       | B |    | 0.88                            | 10.40                    | 7.60                     | 6.80                     | 12.10                    | 6.40                     | 4.20                  |
| 5     | A | 10 | 0.65<br>(0.58 - 0.75)           | 10.46<br>(9.80 - 11.92)  | 7.39<br>(6.87 - 8.17)    | 6.20<br>(5.73 - 6.91)    | 11.39<br>(10.51 - 12.50) | 7.32<br>(6.73 - 8.20)    | 3.76<br>(3.55 - 4.10) |

ARG: arginine; DM: dry matter; HIS: histidine; ISO: isoleucine; LEU: leucine; LYS: lysine; PHE: phenylalanine; VAL: valine.

**Table S11.** Bulk and trace element concentrations in feed samples: Actual supply during recommendation periods of the Society of Nutrition Physiology [31] referred to 88% DM; A = mean (minimum - maximum), B = recommendation [31].

| Phase | N | Ca<br>(g/kg)                   | P<br>(g/kg)            | Ca:P<br>ratio         | Zn<br>(mg/kg)               | Mn<br>(mg/kg)               | Se<br>(mg/kg)         |
|-------|---|--------------------------------|------------------------|-----------------------|-----------------------------|-----------------------------|-----------------------|
| 0     | A | 10<br>13.97<br>(11.02 - 17.47) | 9.20<br>(8.11 - 11.02) | 1.52<br>(1.36 - 1.69) | 144.39<br>(125.85 - 196.28) | 129.55<br>(100.39 - 170.73) | 0.92<br>(0.32 - 1.15) |
|       | B | 13.00                          | 10.00                  | 1.30*                 | 44.00                       | 52.80                       | 0.18                  |
| 1     | A | 10<br>13.22<br>(10.98 - 16.42) | 8.70<br>(7.77 - 9.67)  | 1.53<br>(1.28 - 1.71) | 135.52<br>(130.05 - 148.90) | 115.39<br>(83.15 - 144.25)  | 0.89<br>(0.36 - 1.27) |
|       | B | 13.00                          | 10.00                  | 1.30*                 | 44.00                       | 52.80                       | 0.18                  |
| 2     | A | 10<br>12.39<br>(11.03 - 15.51) | 8.03<br>(7.48 - 8.73)  | 1.55<br>(1.36 - 1.78) | 131.90<br>(122.73 - 144.02) | 112.21<br>(88.88 - 134.89)  | 0.75<br>(0.37 - 1.09) |
|       | B | 11.00                          | 9.00                   | 1.22*                 | 35.20                       | 44.00                       | 0.18                  |
| 3     | A | 10<br>11.35<br>(10.10 - 13.16) | 7.13<br>(6.65 - 7.91)  | 1.59<br>(1.45 - 1.87) | 126.72<br>(105.13 - 144.00) | 109.18<br>(86.73 - 128.38)  | 0.72<br>(0.36 - 0.96) |
|       | B | 9.00                           | 6.00                   | 1.50*                 | 35.20                       | 44.00                       | 0.18                  |
| 4     | A | 10<br>11.29<br>(10.19 - 12.50) | 6.86<br>(6.42 - 7.33)  | 1.64<br>(1.51 - 1.82) | 124.71<br>(112.38 - 133.81) | 113.45<br>(93.36 - 152.10)  | 0.64<br>(0.33 - 0.88) |
|       | B | 7.00                           | 5.00                   | 1.40*                 | 35.20                       | 44.00                       | 0.18                  |
| 5     | A | 10<br>11.04<br>(7.42 - 12.5)   | 6.82<br>(6.32 - 7.01)  | 1.61<br>(1.17 - 1.82) | 120.45<br>(91.58 - 133.81)  | 111.72<br>(79.25 - 152.10)  | 0.63<br>(0.34 - 0.92) |
|       | B | -                              | -                      | -                     | 35.20                       | 44.00                       | 0.18                  |

\* calculated from the recommended Ca and P concentrations (GfE, 2004); Ca: calcium; DM: dry matter; Mn: manganese; P: phosphorus; Se: selenium; Zn: zinc.

**Table S12.** Vitamin concentrations in feed samples: Actual supply during recommendation periods of the Society of Nutrition Physiology [31] referred to 88% DM; A = mean (minimum - maximum), B = recommendation [31].

| Phase |   | N  | Vitamin D <sub>3</sub><br>(IE/kg) | Vitamin E<br>(mg/kg)     |
|-------|---|----|-----------------------------------|--------------------------|
| 0     | A | 10 | 3,550.53<br>(2,854.18 – 4,542.79) | 48.73<br>(41.07 - 68.97) |
|       | B |    | 1,320.00                          | 13.20                    |
| 1     | A | 10 | 3,343.68<br>(2,272.00 – 4,273.64) | 45.22<br>(40.94 - 49.06) |
|       | B |    | 968.00                            | 13.20                    |
| 2     | A | 10 | 3,494.18<br>(2,215.38 – 4,285.82) | 45.96<br>(34.35 - 53.13) |
|       | B |    | 968.00                            | 13.20                    |
| 3     | A | 10 | 3,539.70<br>(2,518.41 – 4,192.86) | 47.13<br>(38.27 - 51.69) |
|       | B |    | 968.00                            | 8.80                     |
| 4     | A | 10 | 3526.01<br>(2,385.73 – 4,066.43)  | 45.67<br>(40.47 - 50.16) |
|       | B |    | 968.00                            | 8.80                     |
| 5     | A | 10 | 3,673.10<br>(2,914.00 – 4,732.00) | 44.26<br>(38.86 - 50.16) |
|       | B |    | 968.00                            | 8.80                     |

DM: dry matter.
